# Supplementary material
Source: PubMed Central journal article supplement (PMC4293759)
Supplement: DS_10.1177_0022034514538973.pdf [file DS_10.1177_0022034514538973.pdf]

H. Yu<sup>1†</sup>, L.T. Qi<sup>2†</sup>, L.S. Liu<sup>3</sup>, X.Y. Wang<sup>3</sup>, Y. Zhang<sup>1</sup>,  
Y. Huo<sup>\*2</sup>, and Q.X. Luan<sup>\*1</sup>

<sup>1</sup>Peking University School and Hospital of Stomatology, Department of Periodontology, Beijing, China; <sup>2</sup>Peking University First Hospital, Cardiology Department, Beijing, China; and <sup>3</sup>Beijing Hypertension League Institute, Laboratory of Human Genetics, Beijing, China; <sup>†</sup>co-first authors contributing equally to this work; <sup>\*</sup>co-corresponding authors, huoyong@263.net.cn, kqluanqx@126.com

*J Dent Res* DOI: 10.1177/0022034514538973

## Association of Carotid Intima–media Thickness and Atherosclerotic Plaque with Periodontal Status

### APPENDIX

**Appendix Table 1.** Correlation Analysis of Maximal cIMT and Other Variables

|                       | Hyperglycemic Group (n = 479) | Euglycemic Group (n = 368) | Total Sample (n = 847) |
|-----------------------|-------------------------------|----------------------------|------------------------|
| Triglycerides         | -0.007                        | 0.058                      | 0.040                  |
| Lipoprotein           |                               |                            |                        |
| High density          | -0.098*                       | -0.243**                   | -0.169**               |
| Low density           | 0.067                         | 0.058                      | 0.063                  |
| Fasting blood glucose | 0.096*                        | -0.061                     | 0.114**                |
| Blood pressure        |                               |                            |                        |
| Systolic              | 0.138*                        | 0.192**                    | 0.163**                |
| Diastolic             | 0.087                         | 0.122*                     | 0.103*                 |
| Body mass index       | 0.112*                        | 0.092                      | 0.112**                |
| Waist:hip ratio       | 0.060                         | 0.081                      | 0.086*                 |
| No. of lost teeth     | 0.059                         | 0.016                      | 0.041                  |
| Mean PLI              | 0.121*                        | 0.131*                     | 0.141**                |
| Mean PD               | 0.071                         | 0.041                      | 0.068                  |
| Mean AL               | 0.109*                        | 0.034                      | 0.086*                 |
| Mean BI               | -0.004                        | 0.018                      | 0.013                  |

Partial correlation coefficients adjusted for sex and age.

cIMT, carotid intima–media wall thickness; PLI, plaque index; PD, probing depth; AL, attachment loss; BI, bleeding index.

\* $p < .05$ . \*\* $p < .001$ .

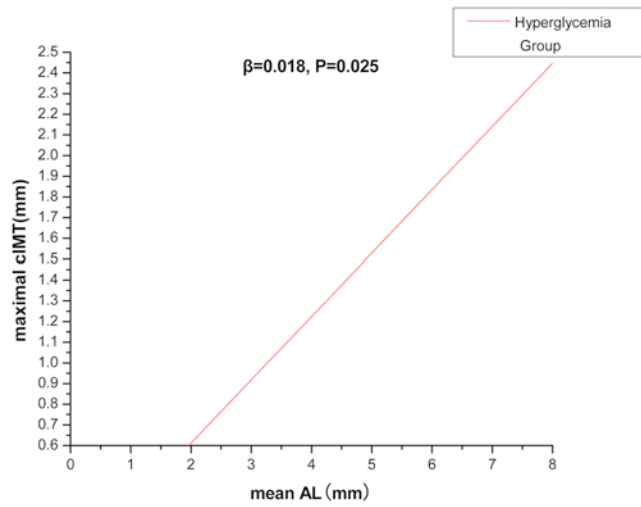

**Appendix Figure.** Regression line showing the association between maximal cIMT and mean AL in hyperglycemia participants. Regression coefficient was calculated after adjustment. cIMT, carotid intima-media wall thickness; AL, attachment loss.
